# Supplementary material
Source: HighWire-hosted journal article supplement (https://erj.ersjournals.com/content/61/2/2103201)
Supplement: inline-supplementary-material-4 [file inline-supplementary-material-4.pdf]

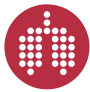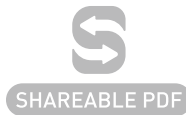

# European Respiratory Society guideline on various aspects of quality in lung cancer care

Torsten Gerriet Blum <sup>1</sup>, Rebecca L. Morgan <sup>2</sup>, Valérie Durieux <sup>3</sup>, Joanna Chorostowska-Wynimko <sup>4</sup>, David R. Baldwin <sup>5</sup>, Jeanette Boyd <sup>6</sup>, Corinne Faivre-Finn <sup>7</sup>, Françoise Galateau-Salle <sup>8</sup>, Fernando Gamarra <sup>9</sup>, Bogdan Grigoriu <sup>10</sup>, Georgia Hardavella <sup>11,12</sup>, Michael Hauptmann <sup>13</sup>, Erik Jakobsen <sup>14</sup>, Dragana Jovanovic <sup>15</sup>, Paul Knaut <sup>1</sup>, Gilbert Massard <sup>16</sup>, John McPhelim <sup>17</sup>, Anne-Pascale Meert <sup>10</sup>, Robert Milroy <sup>18</sup>, Riccardo Muhr <sup>1</sup>, Luciano Mutti <sup>19,20</sup>, Marianne Paesmans <sup>21</sup>, Pippa Powell <sup>6</sup>, Paul Martin Putora <sup>22</sup>, Janette Rawlinson <sup>23</sup>, Anna L. Rich <sup>5</sup>, David Rigau <sup>24</sup>, Dirk de Ruyscher <sup>25,26</sup>, Jean-Paul Sculier <sup>10</sup>, Arnaud Schepereel <sup>27</sup>, Dragan Subotic <sup>28</sup>, Paul Van Schil <sup>29</sup>, Thomy Tonia <sup>30</sup>, Clare Williams <sup>6</sup> and Thierry Berghmans <sup>31</sup>

<sup>1</sup>Department of Pneumology, Lungenklinik Heckeshorn, HELIOS Klinikum Emil von Behring, Berlin, Germany. <sup>2</sup>Department of Health Research Methods, Evidence and Impact, McMaster University, Hamilton, ON, Canada. <sup>3</sup>Bibliothèque des Sciences de la Santé, Université Libre de Bruxelles (ULB), Brussels, Belgium. <sup>4</sup>Department of Genetics and Clinical Immunology, National Institute of Tuberculosis and Lung Diseases, Warsaw, Poland. <sup>5</sup>Department of Respiratory Medicine, Nottingham University Hospitals, Nottingham, UK. <sup>6</sup>European Lung Foundation, Sheffield, UK. <sup>7</sup>Division of Cancer Sciences, University of Manchester and The Christie NHS Foundation Trust, Manchester, UK. <sup>8</sup>Department of Biopathology, MESOPATH/MESOBANK Cancer Center Leon Berard, Lyon, France. <sup>9</sup>Sektion Pneumologie, Klinikum St Elisabeth, Straubing, Germany. <sup>10</sup>Intensive Care and Oncological Emergencies and Thoracic Oncology, Institut Jules Bordet, Centre des Tumeurs de l'Université Libre de Bruxelles (ULB), Brussels, Belgium. <sup>11</sup>Department of Respiratory Medicine, King's College Hospital London, London, UK. <sup>12</sup>Department of Respiratory Medicine and Allergy, King's College London, London, UK. <sup>13</sup>Institute of Biostatistics and Registry Research, Brandenburg Medical School Theodor Fontane and Faculty of Health Sciences Brandenburg, Neuruppin, Germany. <sup>14</sup>Department of Thoracic Surgery, Odense University Hospital, Odense, Denmark. <sup>15</sup>Internal Medicine Clinic "Akta Medica", Belgrade, Serbia. <sup>16</sup>Faculty of Science, Technology and Medicine, University of Luxembourg and Department of Thoracic Surgery, Hôpitaux Robert Schuman, Luxembourg, Luxembourg. <sup>17</sup>Lung Cancer Nurse Specialist, Hairmyres Hospital, NHS Lanarkshire, East Kilbride, UK. <sup>18</sup>Scottish Lung Cancer Forum, Glasgow Royal Infirmary, Glasgow, UK. <sup>19</sup>Department of Biotechnological and Applied Clinical Sciences, University of L'Aquila, L'Aquila, Italy. <sup>20</sup>SHRO/Temple University, Philadelphia, PA, USA. <sup>21</sup>Data Centre, Institut Jules Bordet, Université Libre de Bruxelles (ULB), Brussels, Belgium. <sup>22</sup>Departments of Radiation Oncology, Kantonsspital St Gallen, St Gallen and University of Bern, Bern, Switzerland. <sup>23</sup>European Lung Foundation Patient Advisory Group, Sandwell, UK. <sup>24</sup>Iberoamerican Cochrane Center, Barcelona, Spain. <sup>25</sup>Maastricht University Medical Center, Department of Radiation Oncology (Maastricht Clinic), GROW School for Oncology and Developmental Biology, Maastricht, The Netherlands. <sup>26</sup>Erasmus Medical Center, Department of Radiation Oncology, Rotterdam, The Netherlands. <sup>27</sup>Pulmonary and Thoracic Oncology, Université de Lille, Inserm, CHU Lille, Lille, France. <sup>28</sup>Clinic for Thoracic Surgery, University Hospital Zurich, Zurich, Switzerland. <sup>29</sup>Department of Thoracic and Vascular Surgery, Antwerp University Hospital, Edegem, Belgium. <sup>30</sup>Institute of Social and Preventive Medicine, University of Bern, Bern, Switzerland. <sup>31</sup>Thoracic Oncology, Institut Jules Bordet, Centre des Tumeurs de l'Université Libre de Bruxelles (ULB), Brussels, Belgium.

Corresponding author: Thierry Berghmans ([thierry.berghmans@bordet.be](mailto:thierry.berghmans@bordet.be))

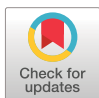

Shareable abstract (@ERSpublications)

**A multidisciplinary ERS Task Force panel including patient representatives created a clinical practice guideline on good quality in lung cancer care. Implementing the 13 consented recommendations can sustainably improve patient experiences and outcomes.** <https://bit.ly/3S3NsFQ>

**Cite this article as:** Blum TG, Morgan RL, Durieux V, *et al.* European Respiratory Society guideline on various aspects of quality in lung cancer care. *Eur Respir J* 2023; 61: 2103201 [DOI: 10.1183/13993003.03201-2021].

This single-page version can be shared freely online.

## Abstract

This European Respiratory Society guideline is dedicated to the provision of good quality recommendations in lung cancer care. All the clinical recommendations contained were based on a comprehensive systematic review and evidence syntheses based on eight PICO (Patients, Intervention, Comparison, Outcomes)

Copyright ©The authors 2023.  
For reproduction rights and  
permissions contact  
[permissions@ersnet.org](mailto:permissions@ersnet.org)

Received: 20 Dec 2021  
Accepted: 23 Sept 2022

questions. The evidence was appraised in compliance with the GRADE (Grading of Recommendations Assessment, Development and Evaluation) approach. Evidence profiles and the GRADE Evidence to Decision frameworks were used to summarise results and to make the decision-making process transparent. A multidisciplinary Task Force panel of lung cancer experts formulated and consented the clinical recommendations following thorough discussions of the systematic review results. In particular, we have made recommendations relating to the following quality improvement measures deemed applicable to routine lung cancer care: 1) avoidance of delay in the diagnostic and therapeutic period, 2) integration of multidisciplinary teams and multidisciplinary consultations, 3) implementation of and adherence to lung cancer guidelines, 4) benefit of higher institutional/individual volume and advanced specialisation in lung cancer surgery and other procedures, 5) need for pathological confirmation of lesions in patients with pulmonary lesions and suspected lung cancer, and histological subtyping and molecular characterisation for actionable targets or response to treatment of confirmed lung cancers, 6) added value of early integration of palliative care teams or specialists, 7) advantage of integrating specific quality improvement measures, and 8) benefit of using patient decision tools. These recommendations should be reconsidered and updated, as appropriate, as new evidence becomes available.
